# Supplementary material
Source: PubMed Central journal article supplement (PMC2494906)

# Supplementary Figure 1a

## Cellular component

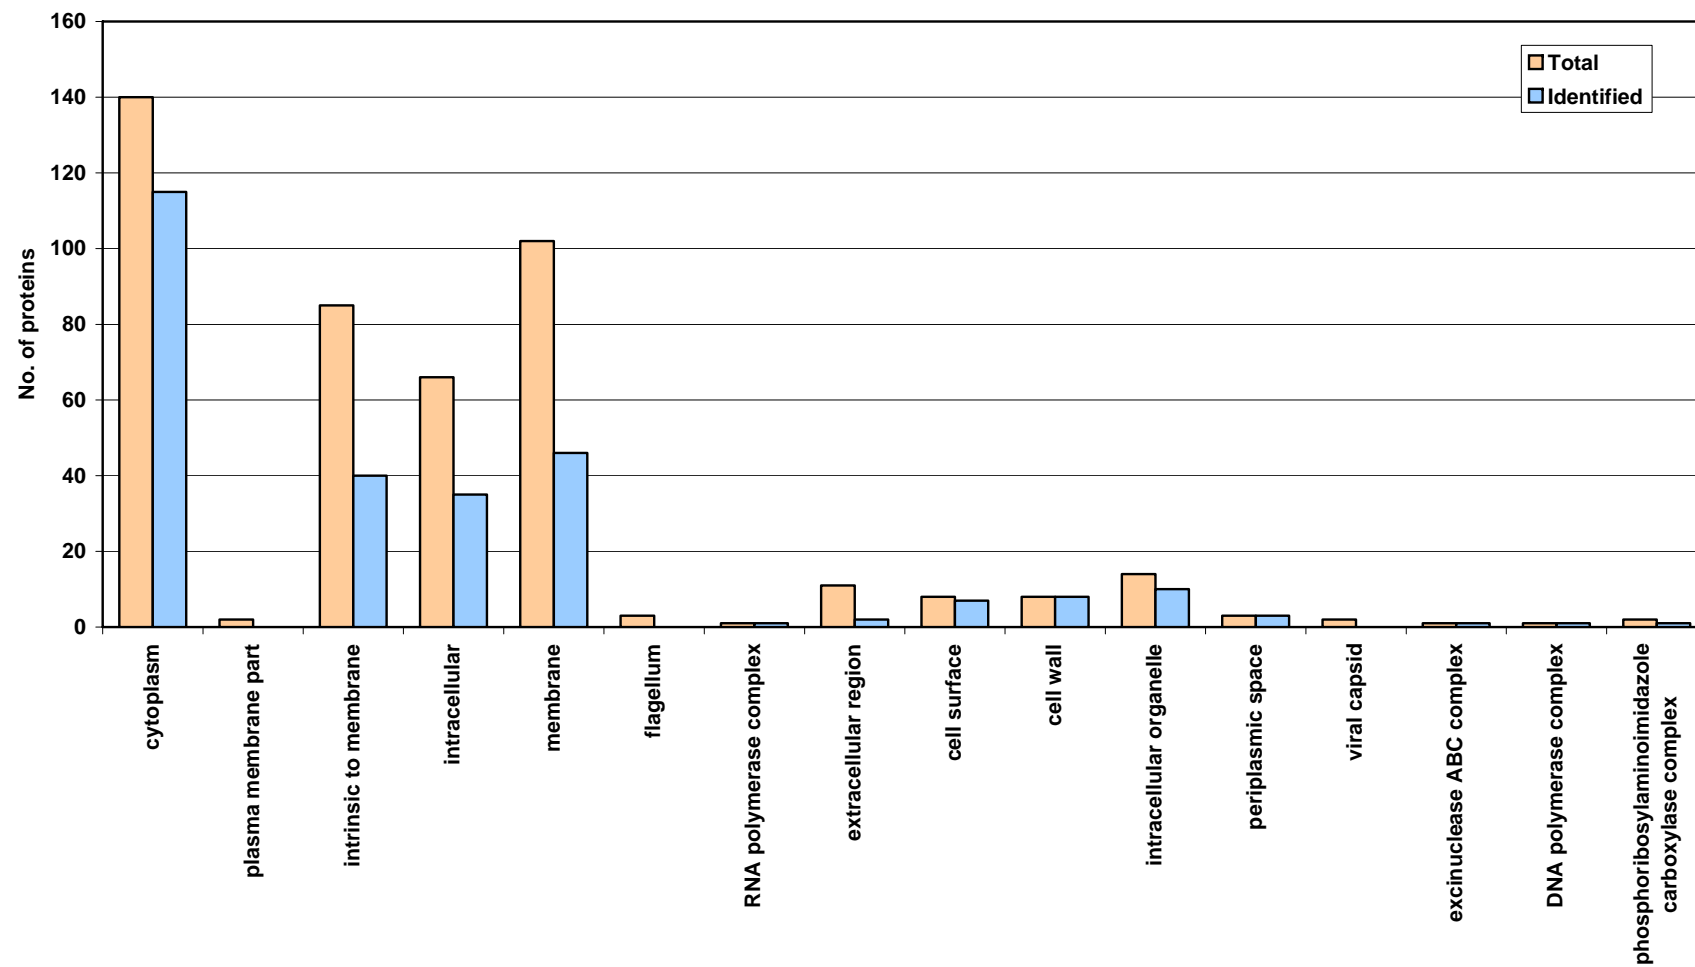

# Supplementary Figure 1b

## Biological process

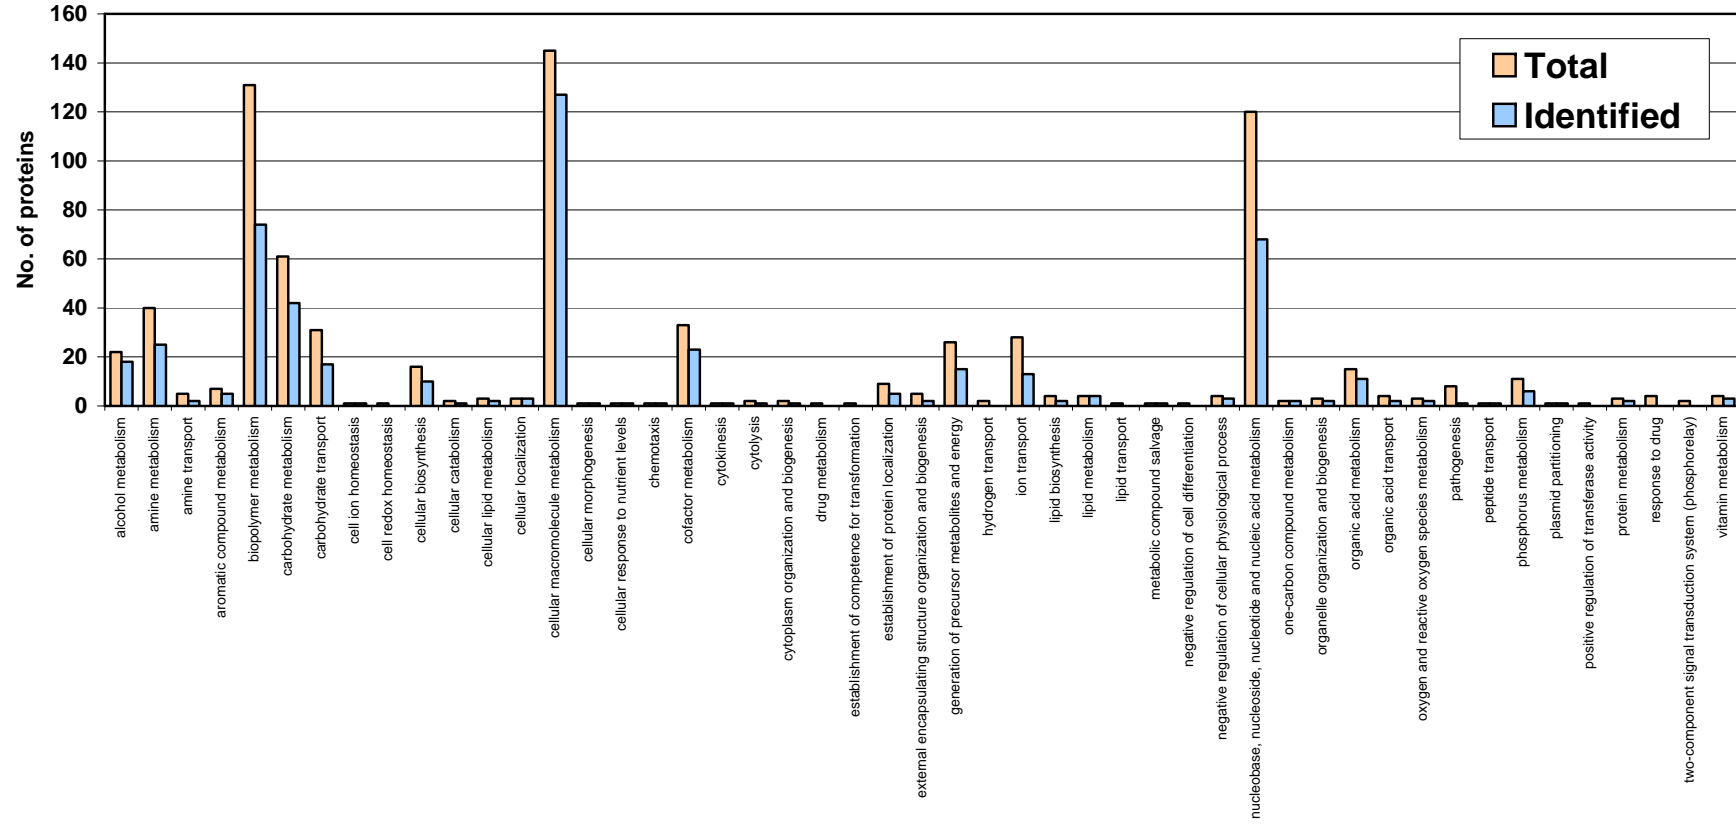

# Supplementary Figure 1c

## Molecular function

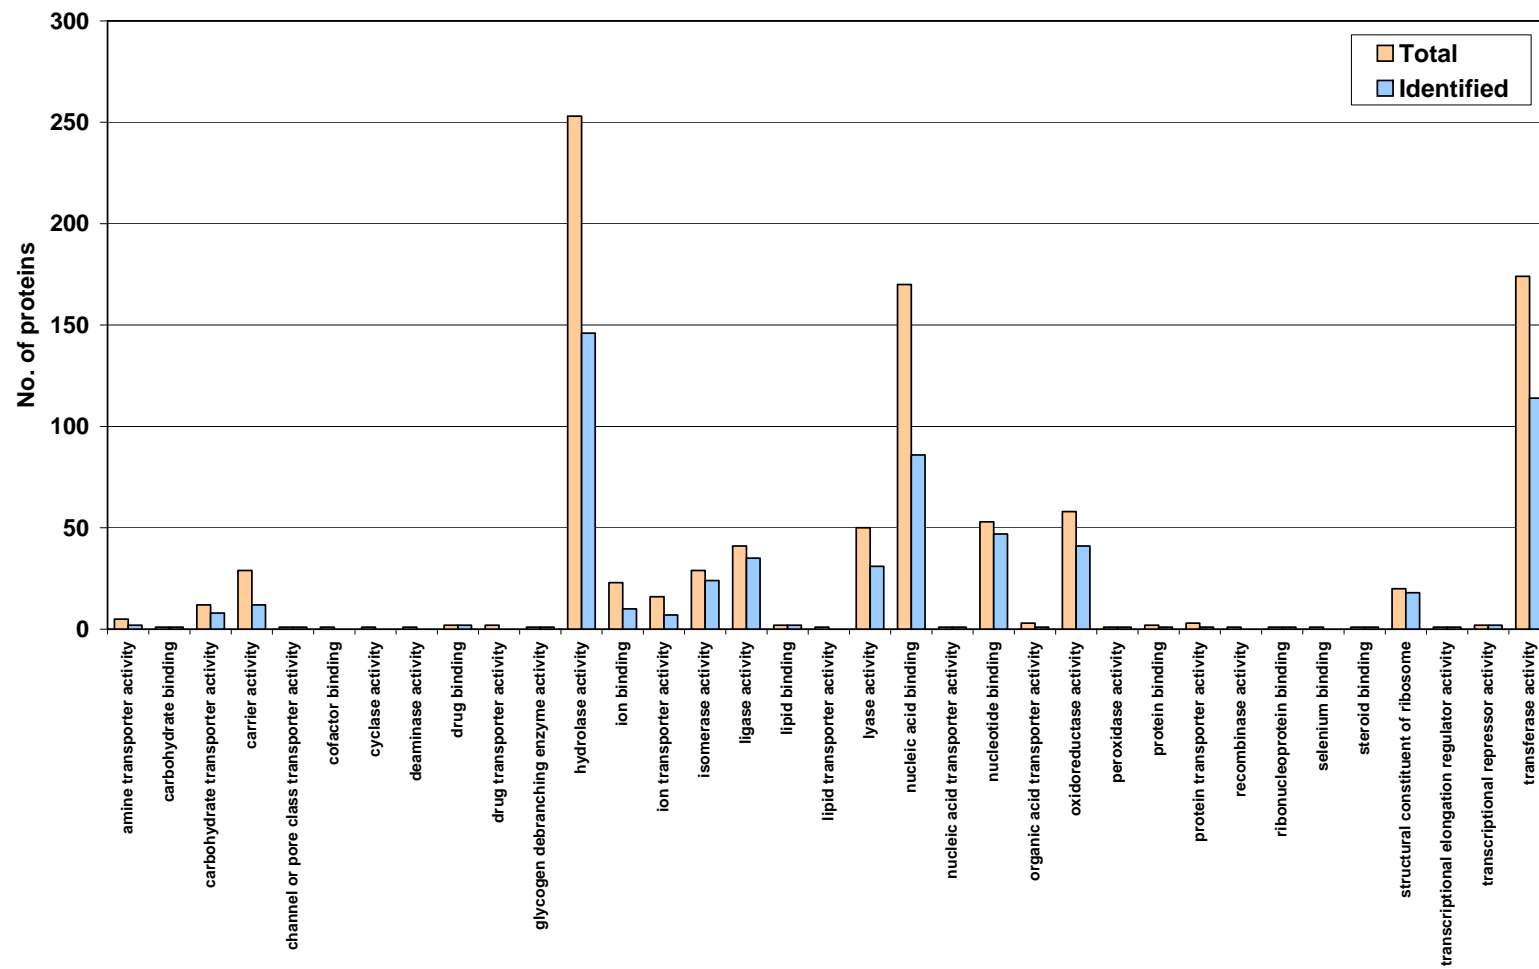

# Supplementary Figure 2

LTQ 3 fmol

Q-TRAP 0.3 fmol

VDEDQFPFPAVPK

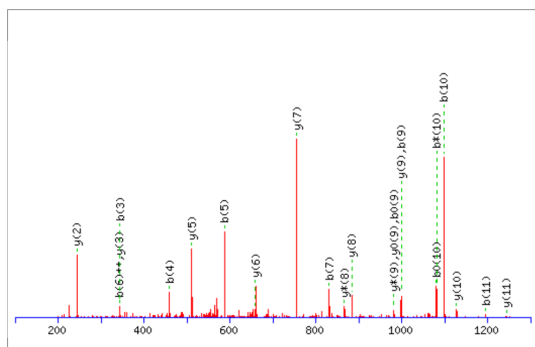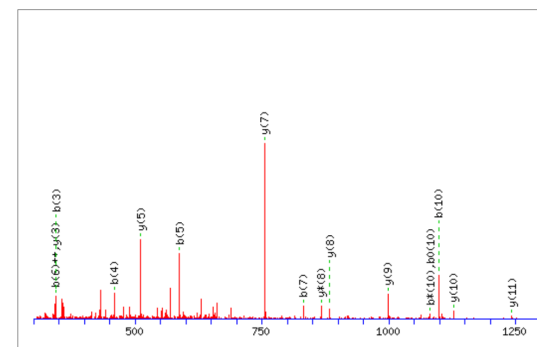

APLDNDIGVSEATR

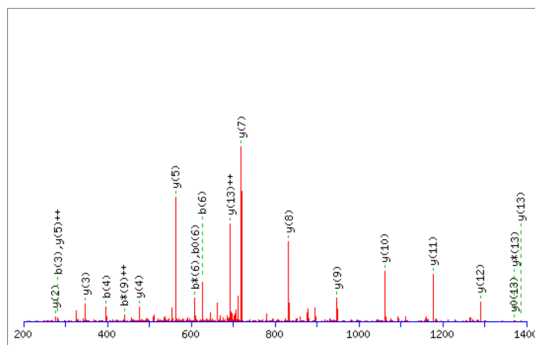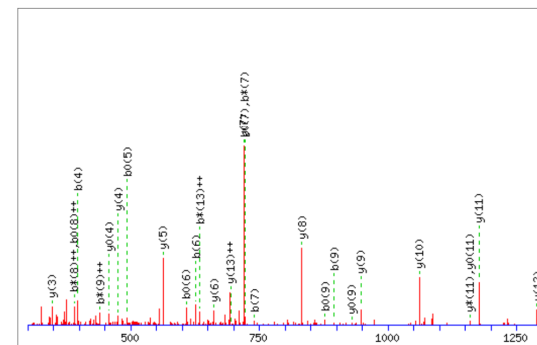

GDFQFNISR

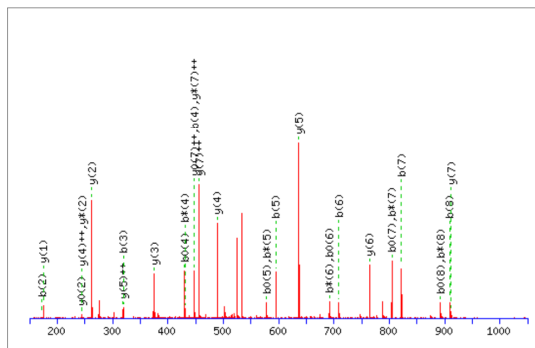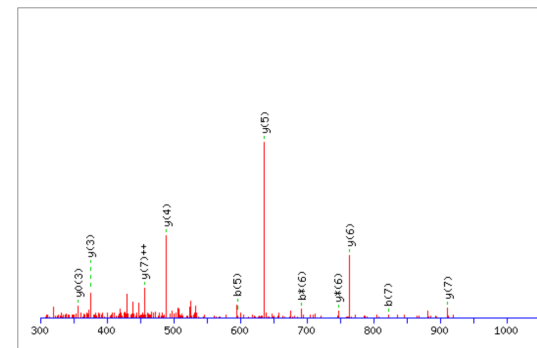

# Supplementary Figure 3

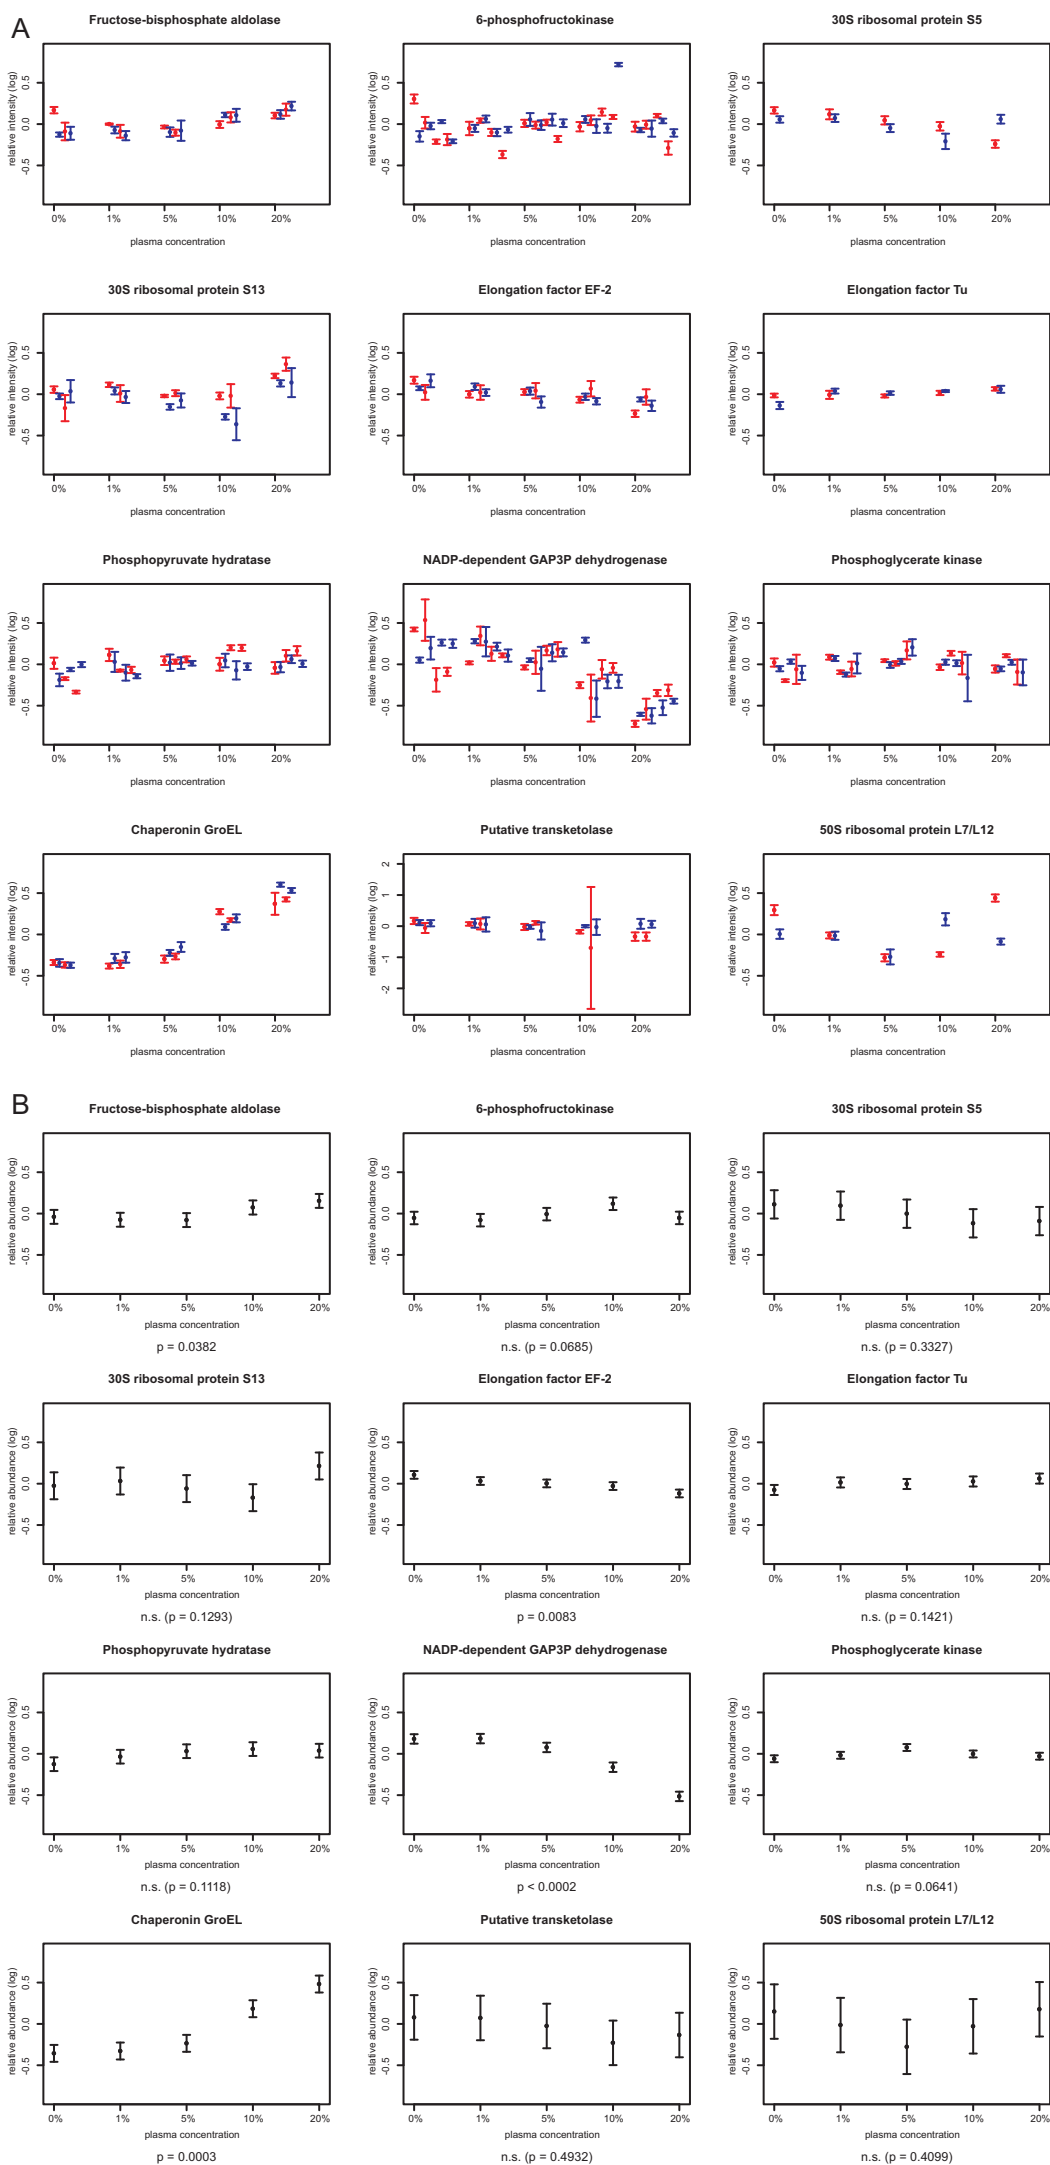

Supplement: M800032-MCP200_2.pdf [file M800032-MCP200_2.pdf]
